# Supplementary material for: Modeling Dynamics of Cell-to-Cell Variability in TRAIL-Induced Apoptosis Explains Fractional Killing and Predicts Reversible Resistance
Source: PubMed Central journal article supplement (PMC4207462; doi:10.1371/journal.pcbi.1003893), 2014-10-23
Supplement: pcbi.1003893.s002.pdf [file pcbi.1003893.s002.pdf]

Stochastic protein turnover model

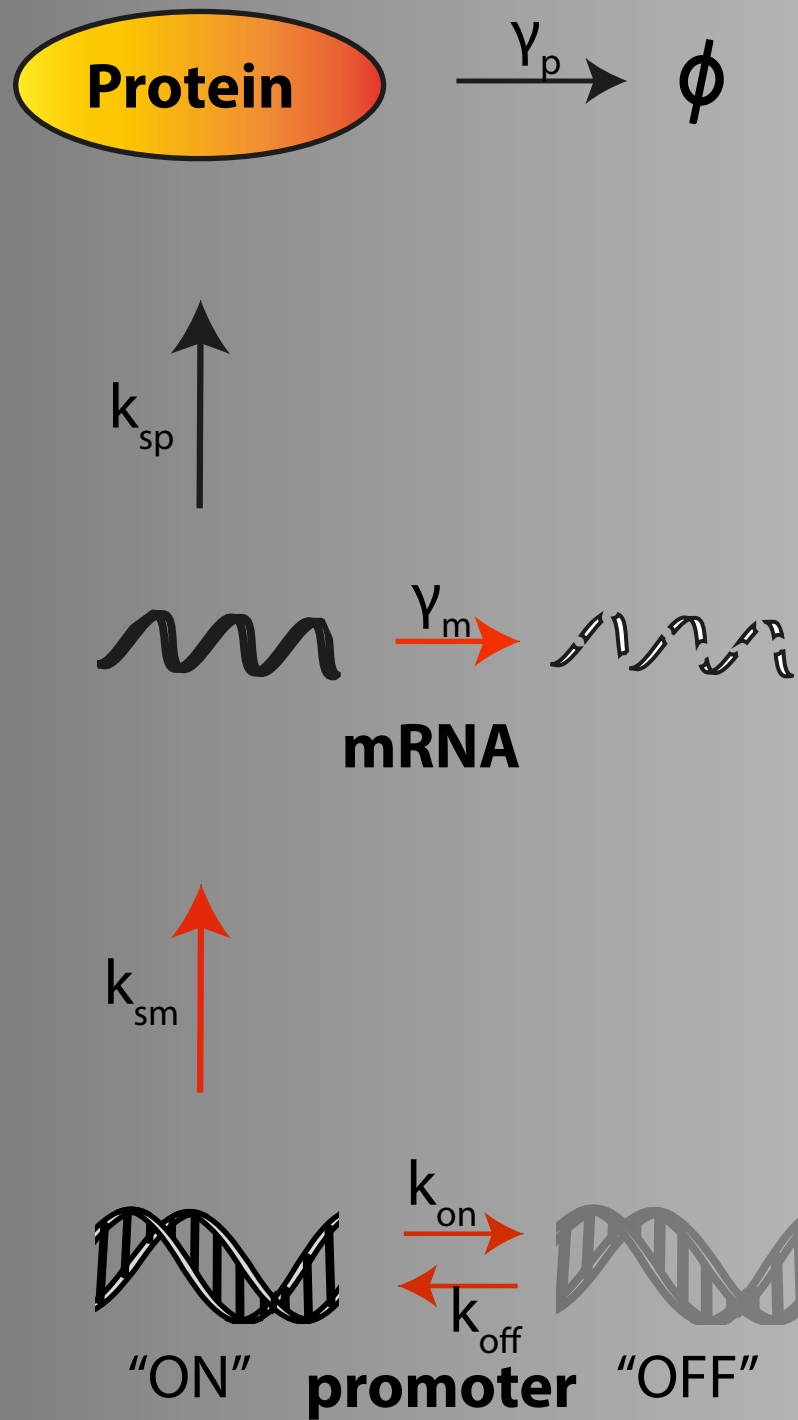

Numerical  
simulations

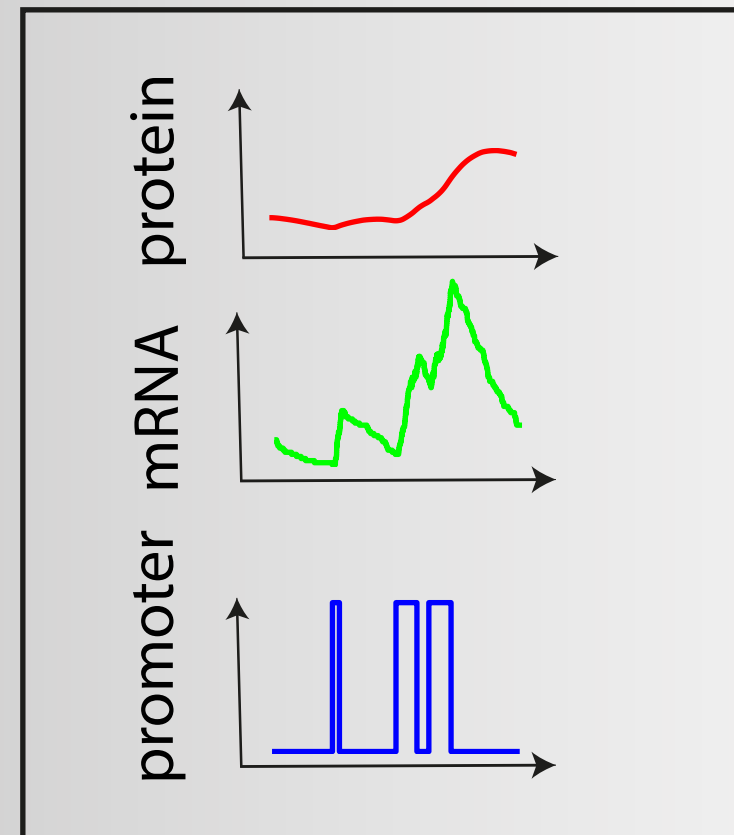

Fluctuations in single cells

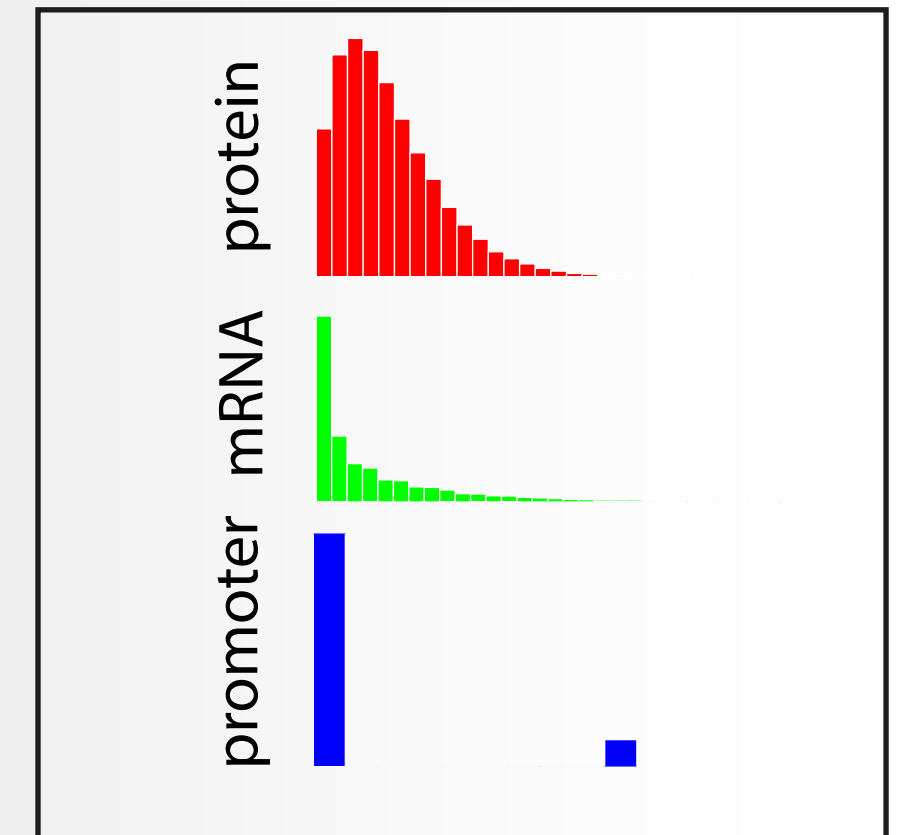

Steady-state population variability

Analytical  
results

protein Autocorrelation<sup>Prot</sup>  
 $= f(k_{on}, k_{off}, k_{sm}, \gamma_m, k_{sp}, \gamma_p)$   
 mRNA Autocorrelation<sup>mRNA</sup>  
 $= f(k_{on}, k_{off}, k_{sm}, \gamma_m)$   
 promoter Autocorrelation<sup>Gene</sup>  
 $= f(k_{on}, k_{off})$

protein Mean<sup>Prot</sup> =  $f(k_{on}, k_{off}, k_{sm}, \gamma_m, k_{sp}, \gamma_p)$   
 Var<sup>Prot</sup> =  $f(k_{on}, k_{off}, k_{sm}, \gamma_m, k_{sp}, \gamma_p)$   
 mRNA Mean<sup>mRNA</sup> =  $f(k_{on}, k_{off}, k_{sm}, \gamma_m)$   
 Var<sup>mRNA</sup> =  $f(k_{on}, k_{off}, k_{sm}, \gamma_m)$   
 promoter Mean<sup>Gene</sup> =  $f(k_{on}, k_{off})$   
 Var<sup>Gene</sup> =  $f(k_{on}, k_{off})$
