# Supplementary material for: Modeling Dynamics of Cell-to-Cell Variability in TRAIL-Induced Apoptosis Explains Fractional Killing and Predicts Reversible Resistance
Source: PubMed Central journal article supplement (PMC4207462; doi:10.1371/journal.pcbi.1003893), 2014-10-23

**A**Short-lived mRNA and protein  
(1 and 2 hours)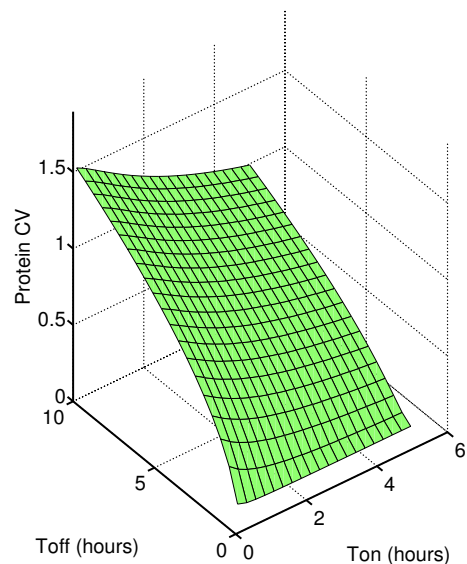Long-lived mRNA and protein  
(9 and 27 hours)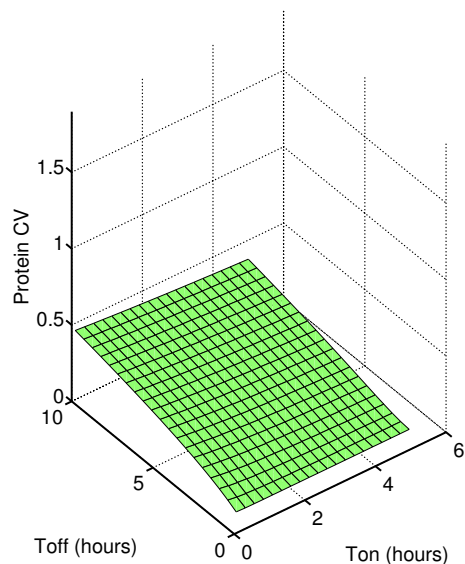**B**

Range of protein coefficient of variation (CV)

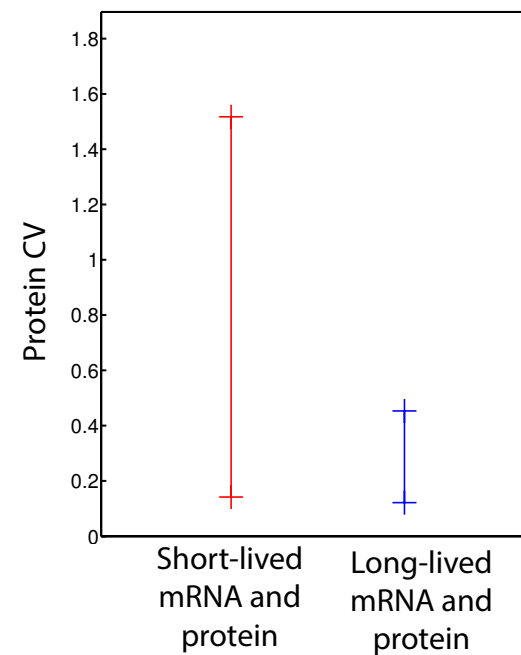**C**Short-lived mRNA and protein  
(1 and 2 hours)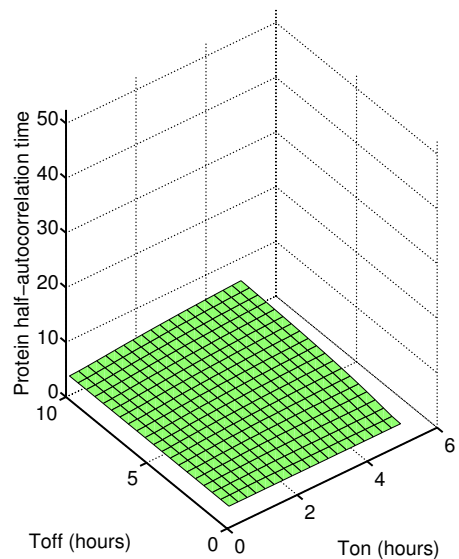Long-lived mRNA and protein  
(9 and 27 hours)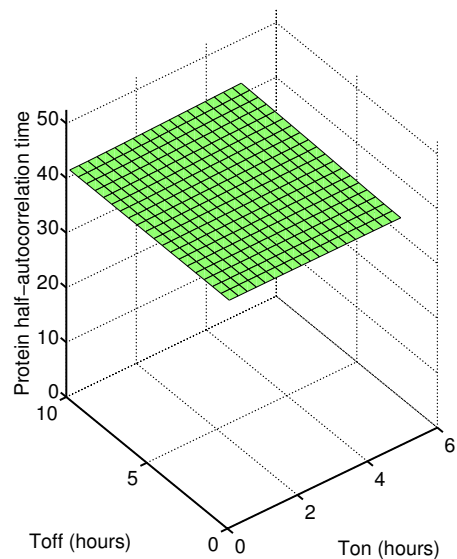**D**

Range of protein half-autocorrelation time

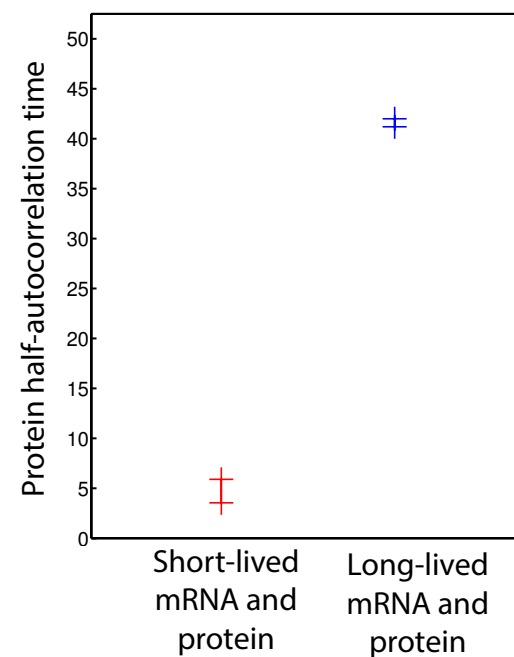

Supplement: pcbi.1003893.s003.pdf [file pcbi.1003893.s003.pdf]
