# Supplementary material for: Modeling Dynamics of Cell-to-Cell Variability in TRAIL-Induced Apoptosis Explains Fractional Killing and Predicts Reversible Resistance
Source: PubMed Central journal article supplement (PMC4207462; doi:10.1371/journal.pcbi.1003893), 2014-10-23
Supplement: pcbi.1003893.s004.pdf [file pcbi.1003893.s004.pdf]

**Native proteins in the kinetic model (17)**

**stable proteins:  
equip with a standard stochastic protein turnover model**

**short-lived proteins:  
Flip and Mcl1**

**standard constraints**

|                    |                                                                                   |
|--------------------|-----------------------------------------------------------------------------------|
| $\gamma_p$         | such that half-life = 27 hrs (dilution)                                           |
| $\gamma_m$         | such that half-life = 9 hrs (typical mRNA stability) (Schwanhausser et al., 2011) |
| $k_{on} + k_{off}$ | = 10.4 hrs <sup>-1</sup> (typical switching speed) (Suter et al., 2011)           |
| Mean mRNA level    | = 17 (typical value) (Schwanhausser et al., 2011)                                 |

|            |                                                      |
|------------|------------------------------------------------------|
| $\gamma_p$ | such that half-life ranges between 0.1 and 1.5 hours |
| $\gamma_m$ | such that half-life ranges between 1 and 4 hours     |
| $k_{on}$   | Wide range explored                                  |
| $k_{off}$  | Wide range explored                                  |

**explore reasonable ranges**

+

+

**particular constraints**

|                           |                              |
|---------------------------|------------------------------|
| Mean protein level        | as in (Spencer et al., 2009) |
| Variance of protein level |                              |

|                 |                                                   |
|-----------------|---------------------------------------------------|
| Mean mRNA level | = 17 (typical value) (Schwanhausser et al., 2011) |
|-----------------|---------------------------------------------------|

**one standard constraint to keep space to explore tractable**

+

**particular constraints**

**All rates determined**

**All rates determined**
