# Supplementary material for: Modeling Dynamics of Cell-to-Cell Variability in TRAIL-Induced Apoptosis Explains Fractional Killing and Predicts Reversible Resistance
Source: PubMed Central journal article supplement (PMC4207462; doi:10.1371/journal.pcbi.1003893), 2014-10-23

**A** Best Model-Data agreement for MOMP distribution in the + CHX condition

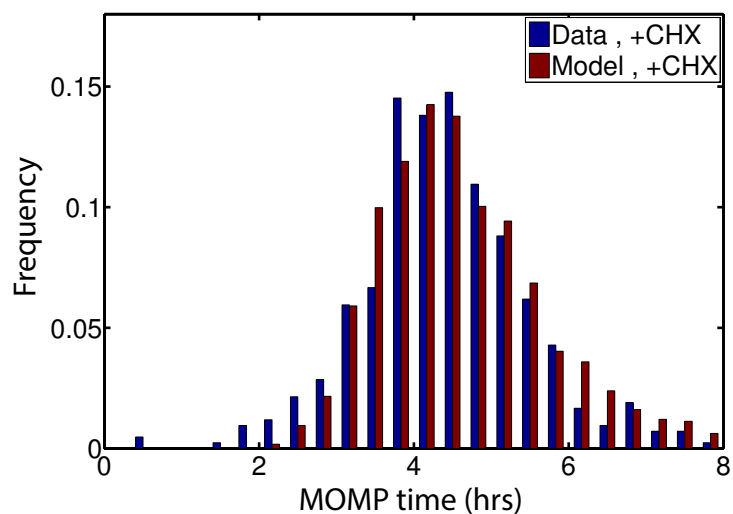

**B** Best Model-Data agreement for sisters MOMP time correlation in the + CHX condition

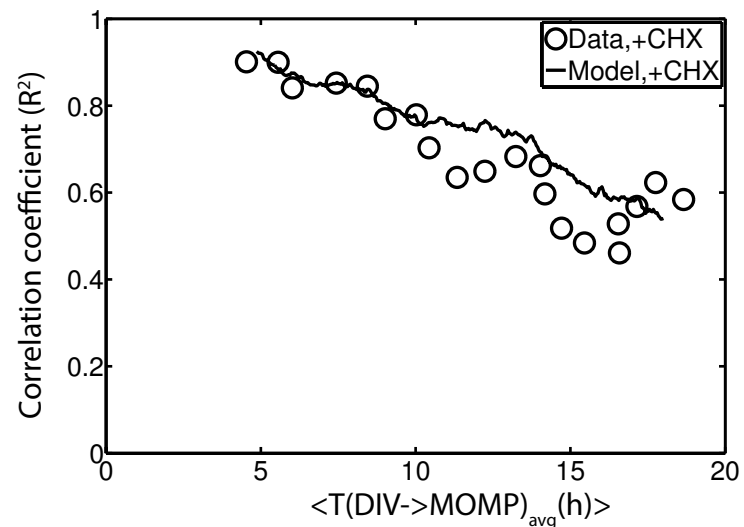

**C** Influence of Flip and Mcl1 protein turnover model rates on Model-Data agreement in the + CHX condition

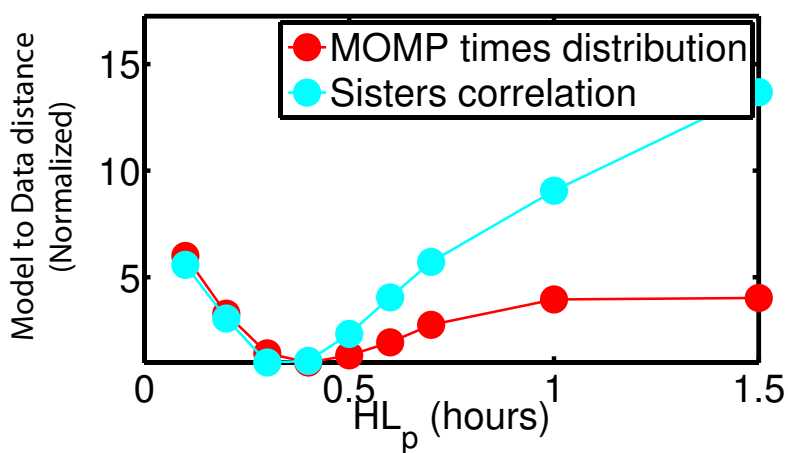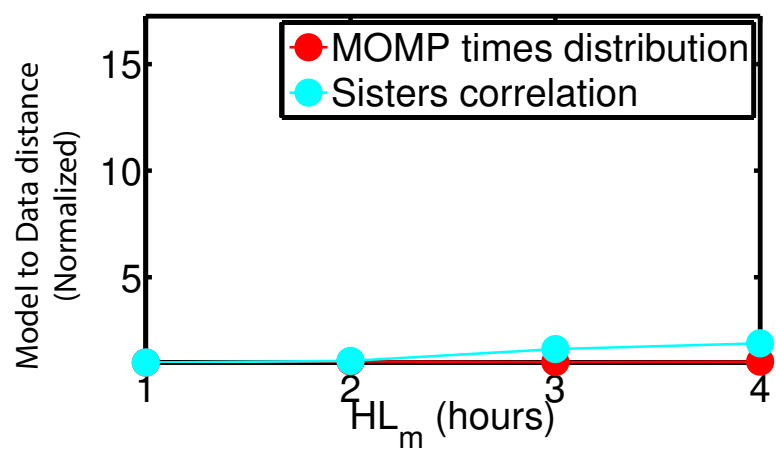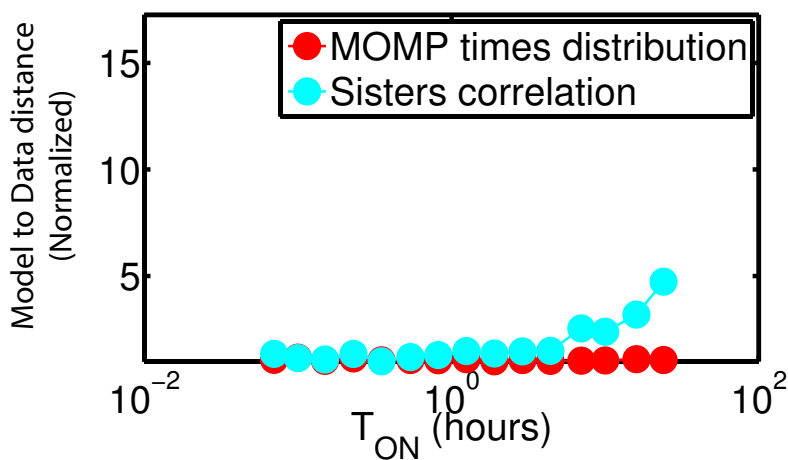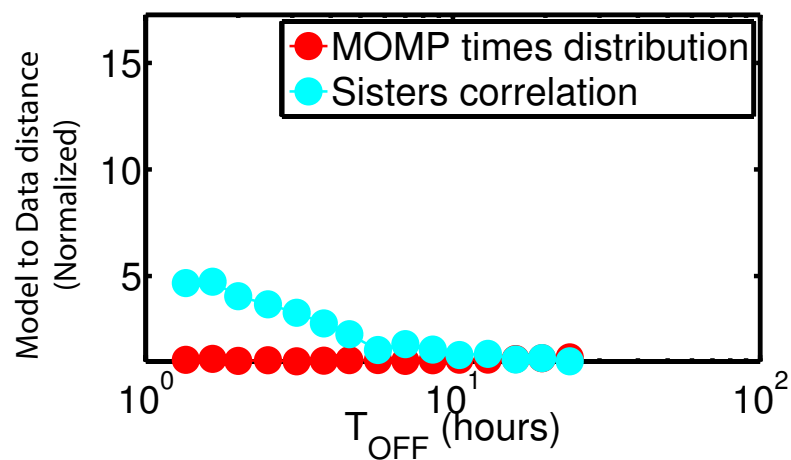

Supplement: pcbi.1003893.s005.pdf [file pcbi.1003893.s005.pdf]
