# Supplementary material for: Modeling Dynamics of Cell-to-Cell Variability in TRAIL-Induced Apoptosis Explains Fractional Killing and Predicts Reversible Resistance
Source: PubMed Central journal article supplement (PMC4207462; doi:10.1371/journal.pcbi.1003893), 2014-10-23

## Mcl1 (and Flip) fluctuations for the “non-fitted” model

Standard promoter switching rates

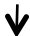

|                               | Mcl1     | Flip |
|-------------------------------|----------|------|
| protein half-life (hrs)       | 0.5      |      |
| mRNA half-life (hrs)          | 2        |      |
| Ton (hrs)                     | 0.1      |      |
| Toff (hrs)                    | 2.6      |      |
| protein distribution CV       | 0.85     |      |
| Protein distribution modality | unimodal |      |

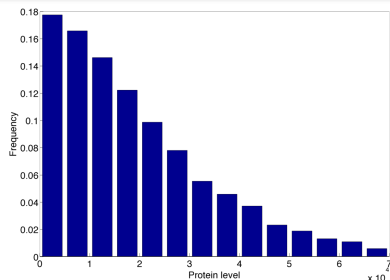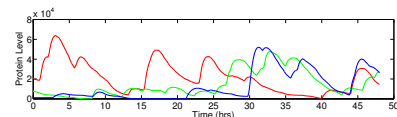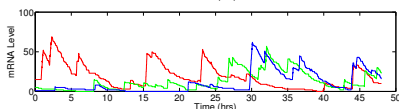

## Mcl1 (and Flip) fluctuations for the “fitted” model

Best agreement found with Spencer et al. cell fate variability data

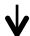

|                               | Mcl1    | Flip |
|-------------------------------|---------|------|
| protein half-life (hrs)       | 0.4     |      |
| mRNA half-life (hrs)          | 1       |      |
| Ton (hrs)                     | 16      |      |
| Toff (hrs)                    | 24      |      |
| protein distribution CV       | 1.15    |      |
| Protein distribution modality | bimodal |      |

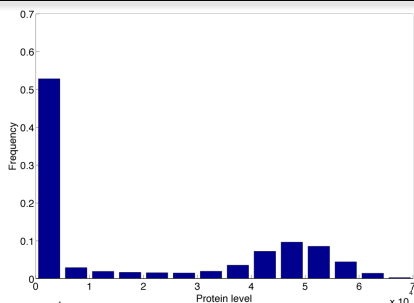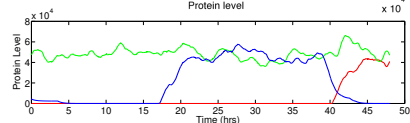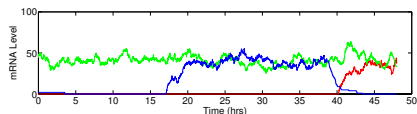

Supplement: pcbi.1003893.s007.pdf [file pcbi.1003893.s007.pdf]
