# Supplementary material for: Modeling Dynamics of Cell-to-Cell Variability in TRAIL-Induced Apoptosis Explains Fractional Killing and Predicts Reversible Resistance
Source: PubMed Central journal article supplement (PMC4207462; doi:10.1371/journal.pcbi.1003893), 2014-10-23

MOMP time distributions

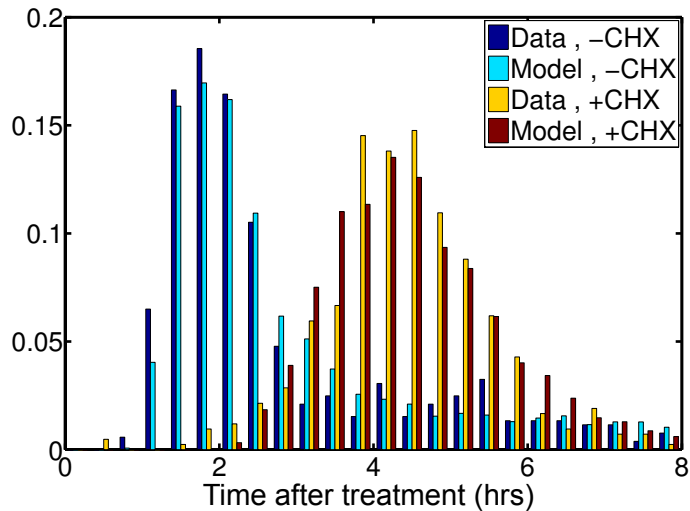

Surviving fractions

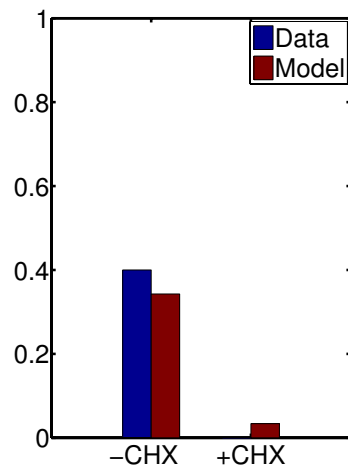

Sister cell MOMP time correlations

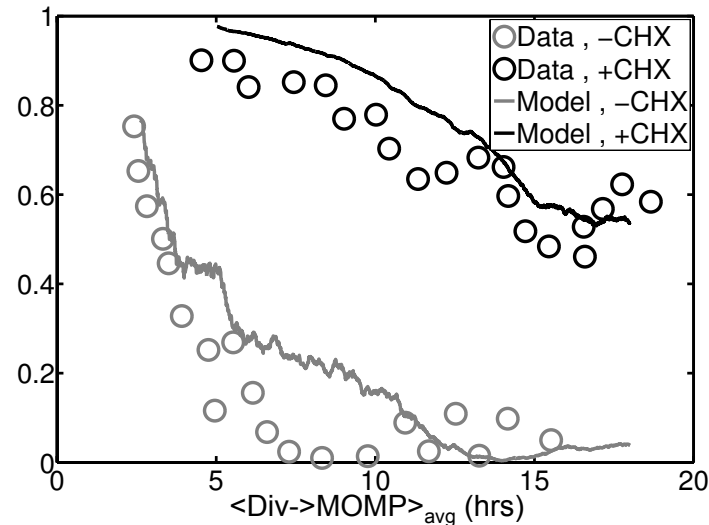

Reversible resistance

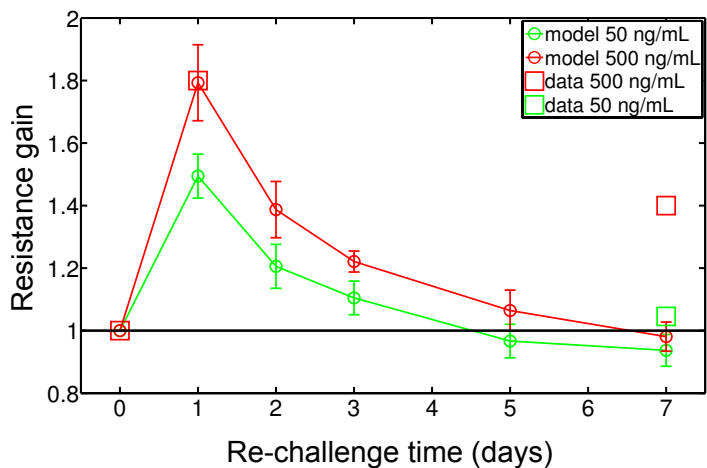

Who were survivors ?

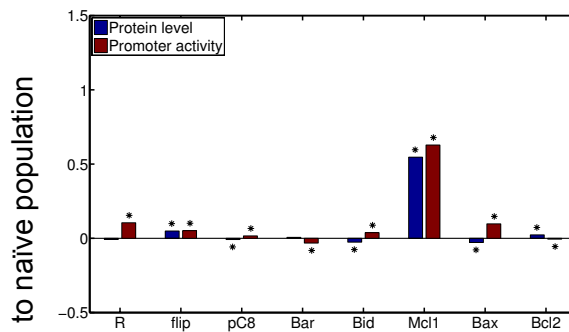

Who are survivors ?

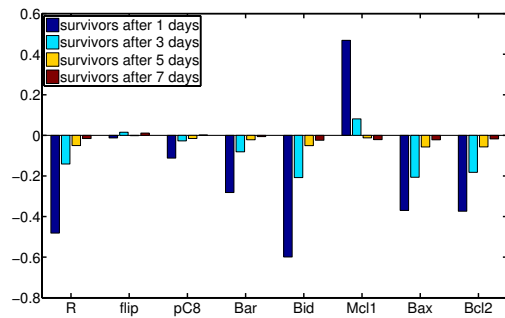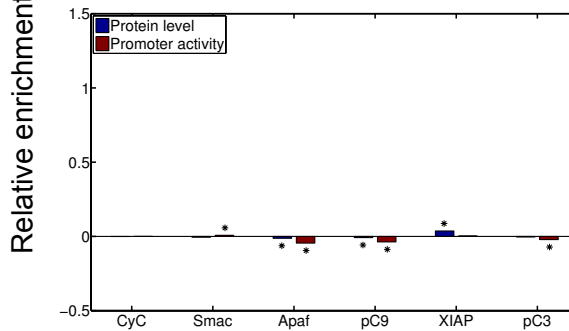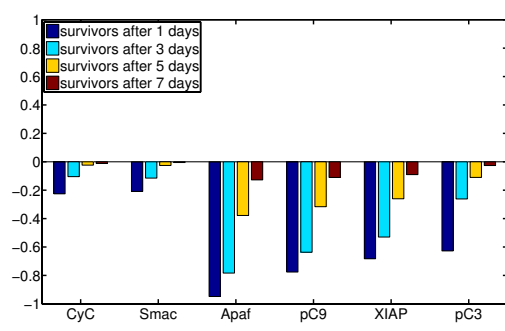

Supplement: pcbi.1003893.s008.pdf [file pcbi.1003893.s008.pdf]
