# Supplementary material for: Modeling Dynamics of Cell-to-Cell Variability in TRAIL-Induced Apoptosis Explains Fractional Killing and Predicts Reversible Resistance
Source: PubMed Central journal article supplement (PMC4207462; doi:10.1371/journal.pcbi.1003893), 2014-10-23

With feedback loop

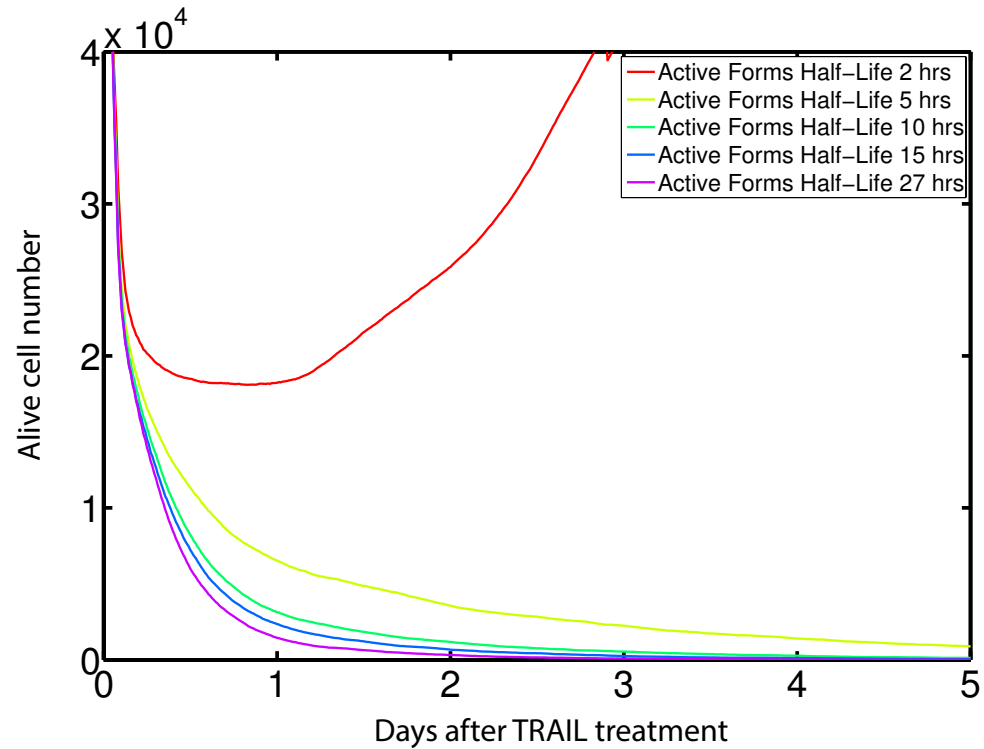

Without feedback loop

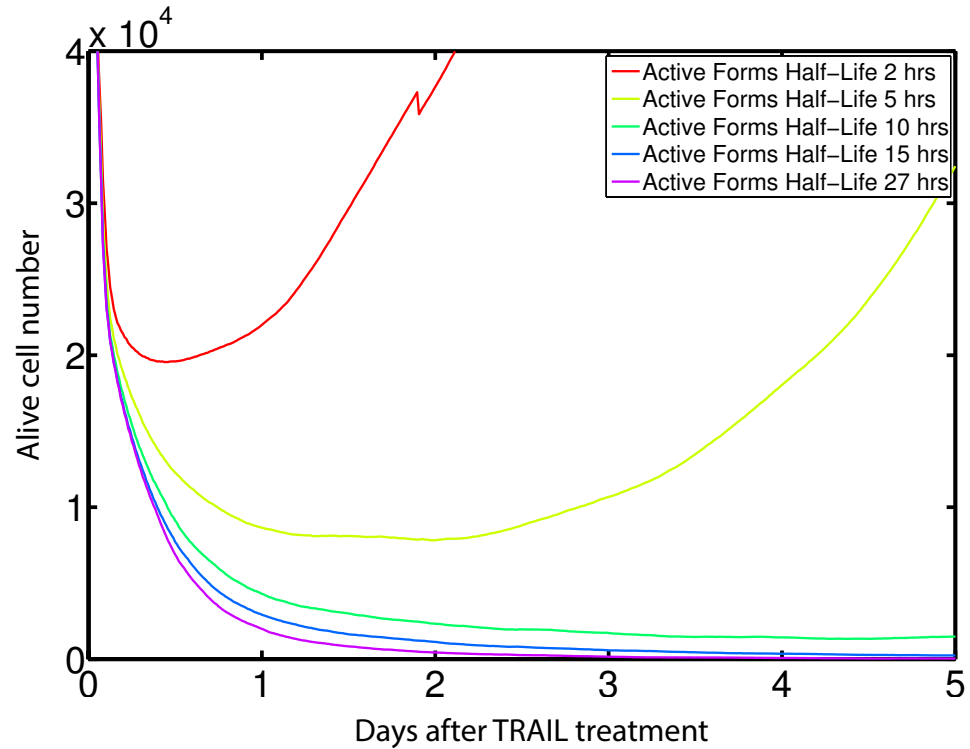

Supplement: pcbi.1003893.s012.pdf [file pcbi.1003893.s012.pdf]
